# Supplementary material for: Effects of Pharmaceutical Substances with Obesogenic Activity on Male Reproductive Health
Source: MDPI journal article supplement (doi:10.3390/ijms25042324), 2024-02-15

## Supplementary material

Illustration of different pharmacological agents with obesogenic activity classified according to the ATC/DD Index ([https://www.whocc.no/atc\\_ddd\\_index/](https://www.whocc.no/atc_ddd_index/), accessed on 28 December 2023). Molecular structures retrieved from ChemSpider and PubChem.

**Figure S1**

### **A: Alimentary tract and metabolism**

#### **A10:Antidiabetics**

##### **A10A: Insulin**

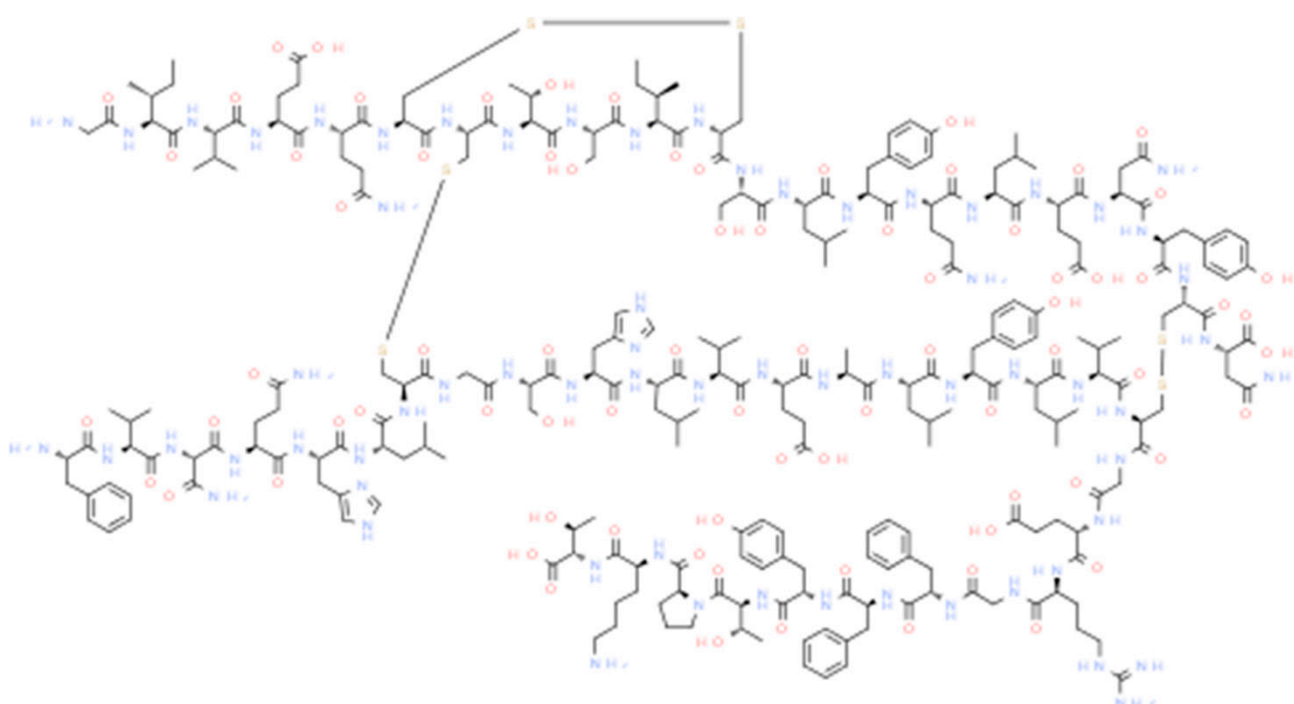

##### **A10BA: Biguanides**

###### **A10BA02: Metformin**

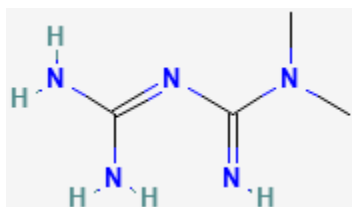

##### **A10BG: Thiazolidinediones**

###### **A10BG03: Pioglitazone**

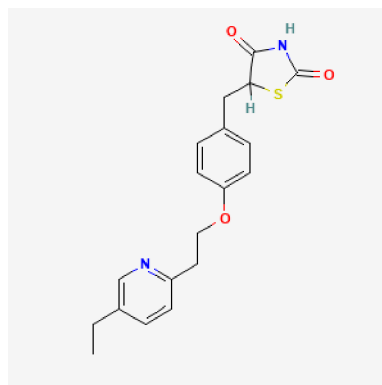

## C: Cardiovascular System

### C07A: Beta Blocking agents

C07AG02: Carvediol

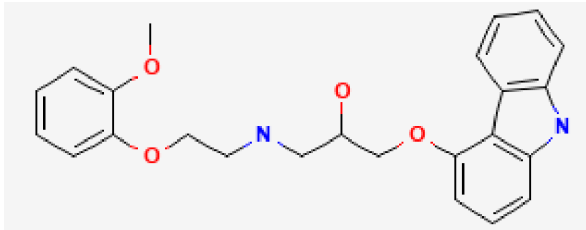

C07AB02: Metoprolol

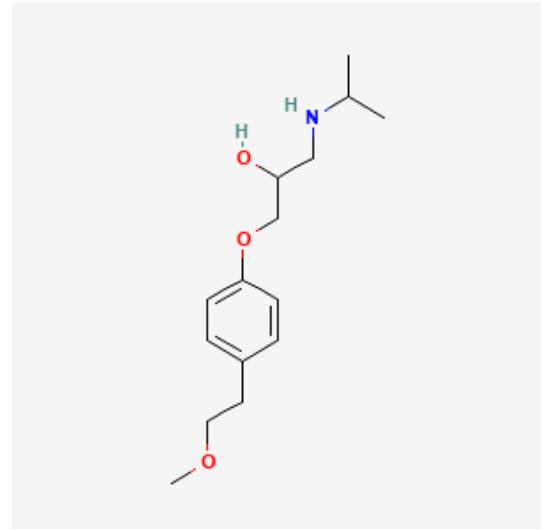

## H: Systemic Hormonal Preparations

### H02: Corticosteroids

Corticosterone

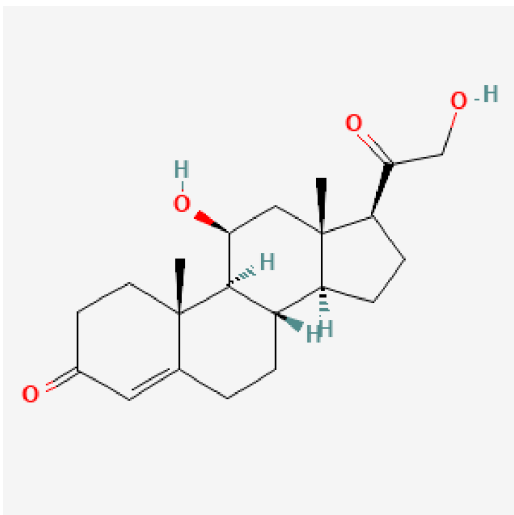

H02AB: Glucocorticoids

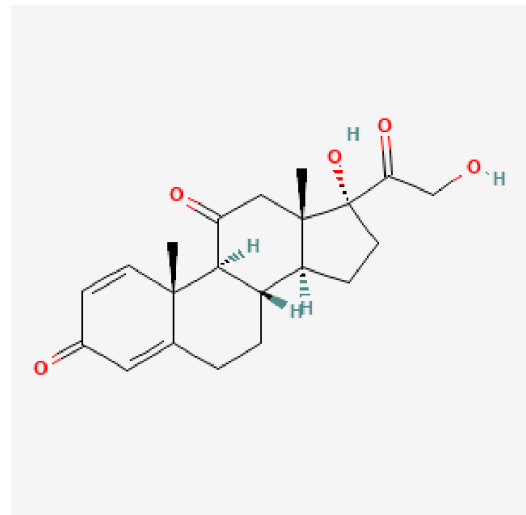

**Figure S2**

**N: Nervous System**

**N02: Analgesics**

**N02B: Other analgesics and antipyretics**

N02BF: Gabapentinoids

N02BF01: Gabapentin

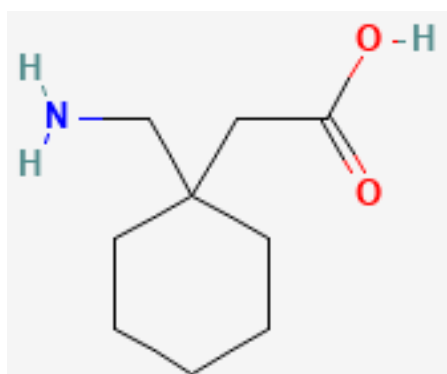

N02BF02: pregabalin

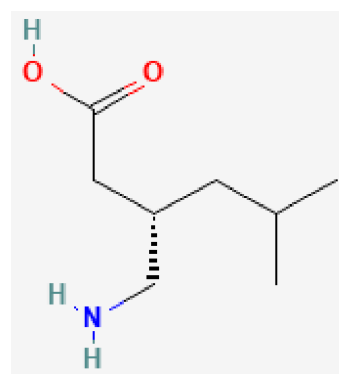

**N03: Antiepileptics**

**N03AB: Hydantoin derivatives**

N03AB02: phenytoin

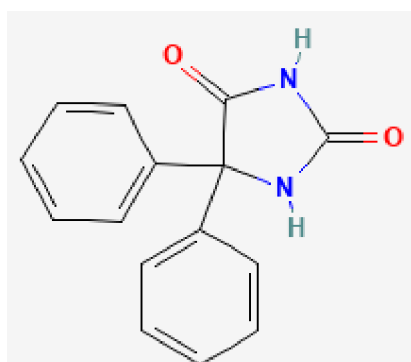

N03AF: Carboxamide derivatives

N03AF01: Carbamazepine

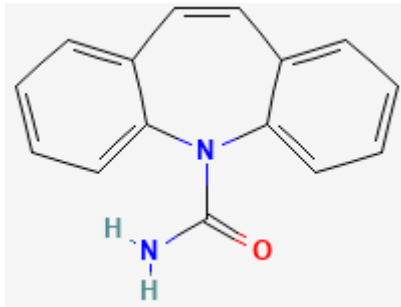

N03AG: Fatty acid derivatives

N03AG01: Valproic Acid

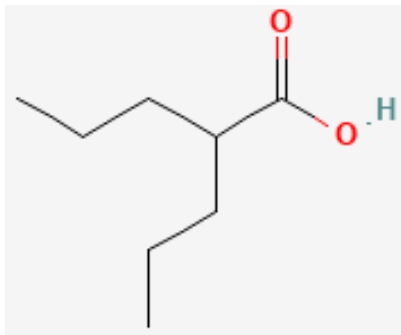

N03AX: Other antiepileptics

N03AX11: Topiramate

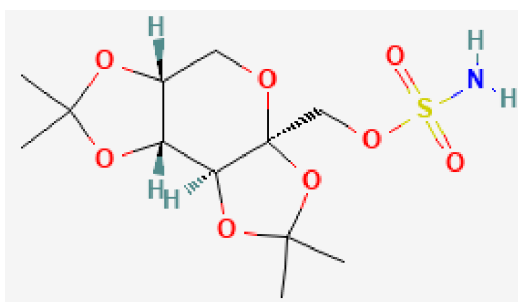

N03AX15: zonisamide

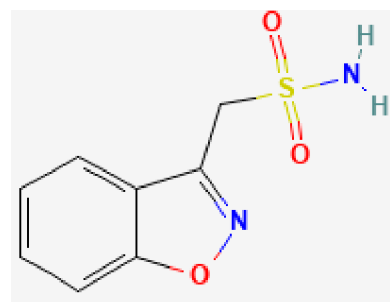

## N05: Psycholeptics | N05A: Antipsychotics

N05AD: Butyrophenone derivatives

N05AD01: Haloperidol

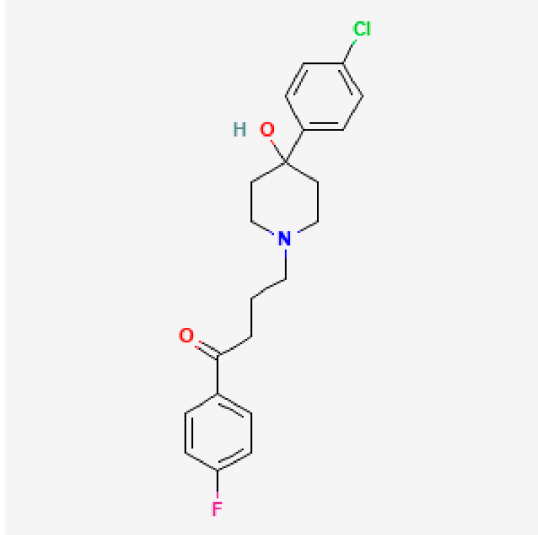

N05AE: Indole derivatives

N05AE04: Ziprasidone

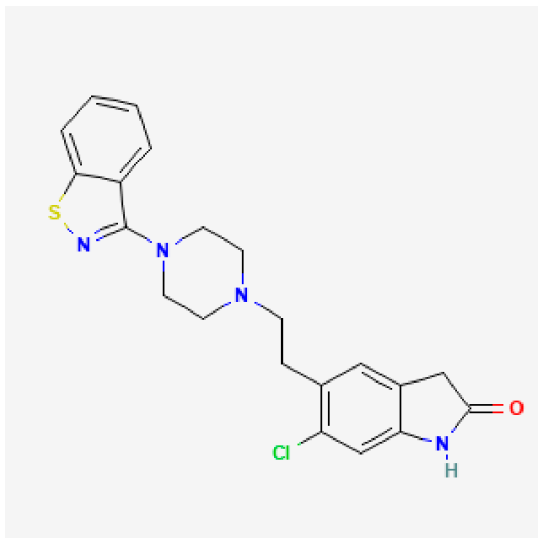

N05AL: Benzamides  
N05AL05: Amisulpride

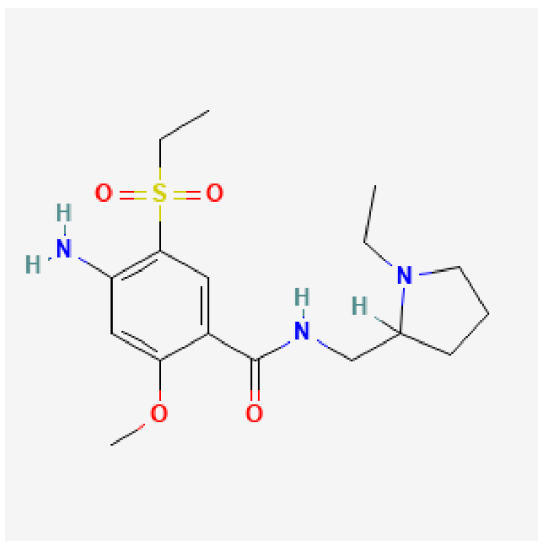

N05AX Other antipsychotics  
N05AX08: Risperidone

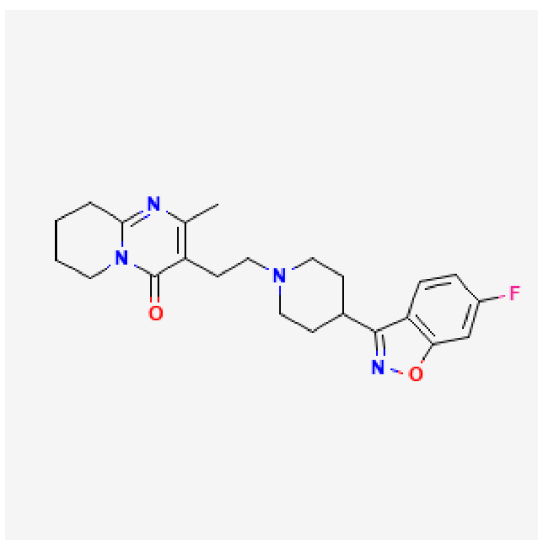

N05AX12: Aripiprazole

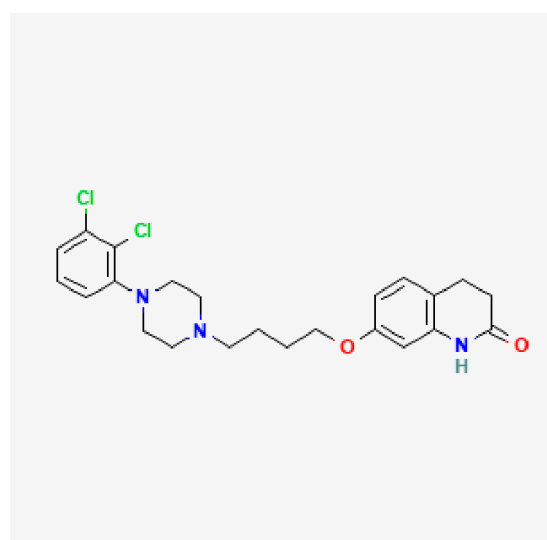

## N06: Psychoanaleptics | N06A: Antidepressants

N06AA: Nonselective monoamine reuptake inhibitors

N06AA09: Amitriptyline

N06AA10: Nortriptyline

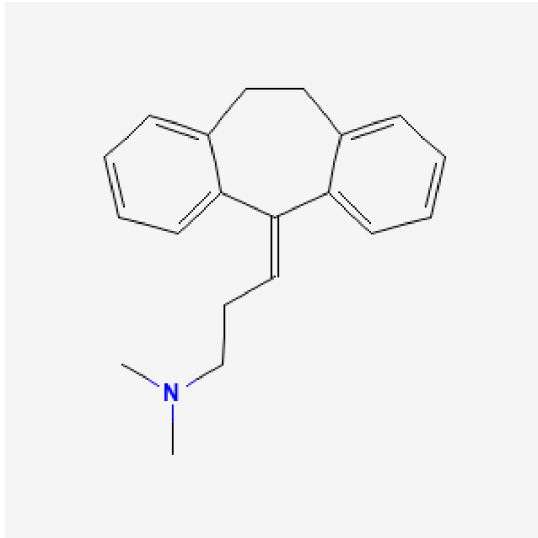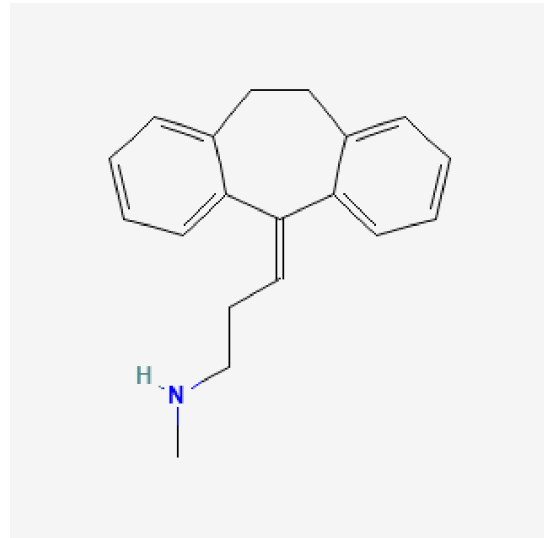

N06AB: Selective serotonin reuptake inhibitors

N06AB03: Fluoxetine

N06AB04: Citalopram

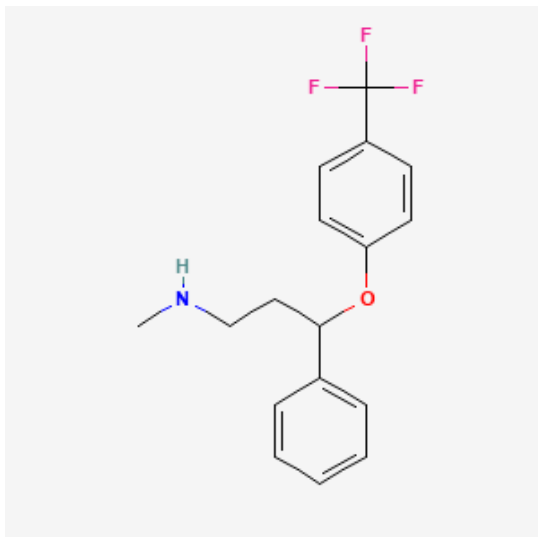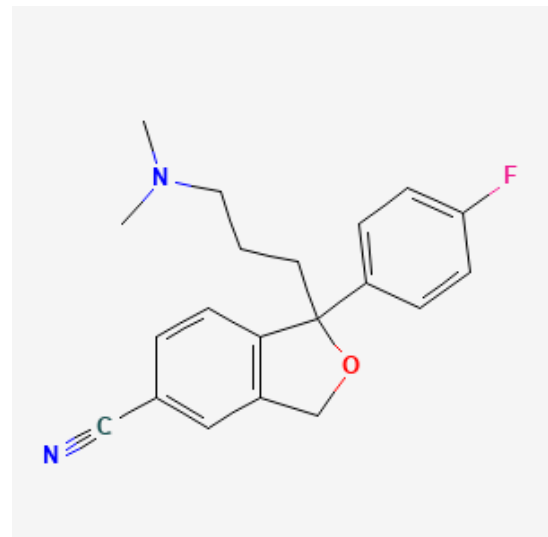

Chemical structure of (S)-1-(3,4-dichlorophenyl)-2-methyl-1,2,3,4-tetrahydronaphthalene. The structure shows a tetrahydronaphthalene core. The chiral center at C1 is bonded to a methyl group (wedge) and a hydrogen atom (dash, labeled 'H'). The C2 position is bonded to a 3,4-dichlorophenyl group via a dashed bond. The chlorine atoms are green.

N06AX1: Mirtazapine

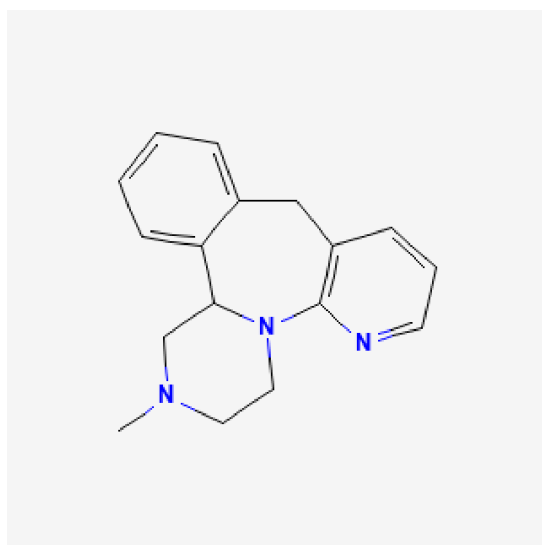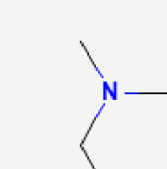

Chemical structure of 4-methoxy-N,N-dimethyl-1-(cyclohexylmethyl)benzylamine. The structure shows a benzene ring substituted with a methoxy group (-OCH<sub>3</sub>) at the para position and a dimethylaminomethyl group (-CH<sub>2</sub>N(CH<sub>3</sub>)<sub>2</sub>) at the other para position. A cyclohexylmethyl group (-CH<sub>2</sub>C<sub>6</sub>H<sub>11</sub>) is attached to the benzene ring at the 1-position.



N06AX21: Duloxetine

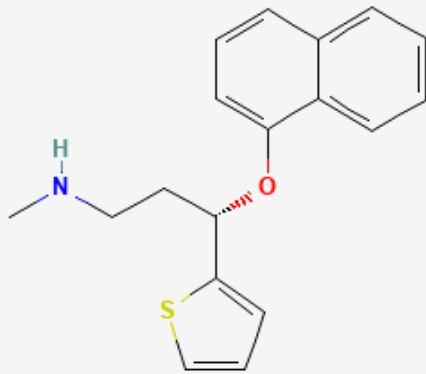

Supplement: s1 [file s1]
